# Supplementary material for: Versatile coordination behaviour of the chloro-tetrazine-picolylamine ligand: mixed-valence binuclear Cu(i)/Cu(ii) complexes
Source: Royal Society of Chemistry journal article supplement (doi:10.1039/c9dt02379h), 2019-01-01
Supplement: c9dt02379h1.pdf [file c9dt02379h1.pdf]

## SUPPORTING INFORMATION

### **Versatile coordination behaviour of chloro-tetrazine-picolyamine ligand: mixed-valence binuclear Cu(I)/Cu(II) complexes†**

Oleh Stetsiuk,<sup>a,b</sup> Svitlana R. Petrusenko,<sup>b</sup> Lorenzo Sorace,<sup>c</sup> Alexandru Lupan,<sup>d</sup> Amr A.A. Attia,<sup>d</sup> Vladimir N. Kokozay,<sup>b</sup> Abdelkrim El-Ghayoury<sup>a</sup> and Narcis Avarvari\*<sup>a</sup>

<sup>a</sup>*MOLTECH-Anjou, UMR 6200, CNRS, UNIV Angers, 2 bd Lavoisier, 49045 ANGERS Cedex, France.*

*Fax: (+33)02 41 73 54 05; Tel: (+33)02 41 73 50 84. E-mail: [narcis.avarvari@univ-angers.fr](mailto:narcis.avarvari@univ-angers.fr)*

<sup>b</sup>*Department of Inorganic Chemistry, Taras Shevchenko National University of Kyiv, Volodymyrska str. 64/13, Kyiv 01601, Ukraine*

<sup>c</sup>*Dipartimento di Chimica “Ugo Schiff” and UdR INSTM, Università di Firenze, 50019 Sesto Fiorentino, Italy*

<sup>d</sup>*Faculty of Chemistry and Chemical Engineering, Babes-Bolyai University, Cluj-Napoca, Romania*

## Ligand HL<sup>1</sup> 1

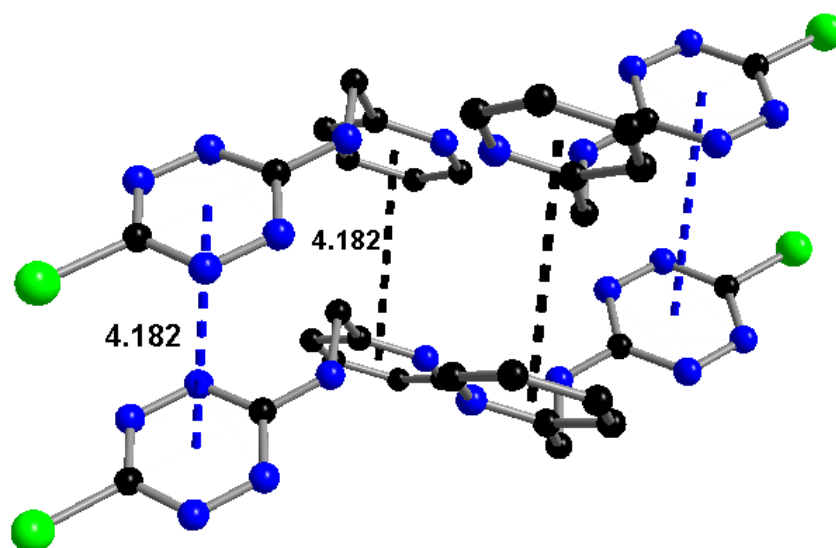

Figure S1. Interaction between tetrazine (blue line) and pyridine (black line) rings in HL<sup>1</sup>. Hydrogen atoms were omitted.

Table S1. Hydrogen bonds parameters for HL<sup>1</sup>

| d(A...H), Å         | d(A...D), Å         | ∠(A-H-D), ° |
|---------------------|---------------------|-------------|
| N(1)···H(2) = 2.07  | N(1)···N(2) = 2.90  | 162         |
| Cl(1)···H(4) = 2.94 | Cl(1)···C(4) = 3.82 | 159         |

Table S2. Distance matrix for the optimized structure

|       |  | 6        | 7        | 8        | 9        | 10       |
|-------|--|----------|----------|----------|----------|----------|
| 6 H   |  | 0.000000 |          |          |          |          |
| 7 C   |  | 2.150991 | 0.000000 |          |          |          |
| 8 H   |  | 2.504131 | 1.090402 | 0.000000 |          |          |
| 9 C   |  | 3.371196 | 1.382256 | 2.147918 | 0.000000 |          |
| 10 C  |  | 4.669680 | 2.524076 | 2.748687 | 1.500362 | 0.000000 |
| 11 H  |  | 5.243901 | 3.168135 | 3.402801 | 2.134593 | 1.100620 |
| 12 H  |  | 4.723822 | 2.637579 | 2.404320 | 2.151785 | 1.096755 |
| 13 C  |  | 5.831379 | 3.957237 | 4.144259 | 3.095690 | 2.397823 |
| 14 C  |  | 7.106123 | 5.661114 | 5.644126 | 5.205287 | 4.728937 |
| 15 N  |  | 3.863130 | 2.384271 | 3.356764 | 1.323507 | 2.373712 |
| 16 N  |  | 5.645790 | 3.588216 | 3.890793 | 2.434236 | 1.430155 |
| 17 H  |  | 6.040647 | 4.077431 | 4.580623 | 2.764196 | 2.076049 |
| 18 N  |  | 5.362338 | 3.650632 | 3.544794 | 3.249920 | 2.713296 |
| 19 N  |  | 6.131036 | 4.693868 | 4.513143 | 4.451920 | 4.012221 |
| 20 N  |  | 7.423285 | 5.863063 | 6.054813 | 5.129867 | 4.631452 |
| 21 N  |  | 6.819366 | 5.083248 | 5.387773 | 4.146082 | 3.578734 |
| 22 Cl |  | 8.355330 | 7.131295 | 7.025981 | 6.820922 | 6.390512 |
|       |  | 11       | 12       | 13       | 14       | 15       |
| 11 H  |  | 0.000000 |          |          |          |          |
| 12 H  |  | 1.771188 | 0.000000 |          |          |          |
| 13 C  |  | 3.268655 | 2.621173 | 0.000000 |          |          |
| 14 C  |  | 5.672644 | 4.602031 | 2.479758 | 0.000000 |          |
| 15 N  |  | 2.738433 | 3.298920 | 3.506352 | 5.631622 | 0.000000 |
| 16 N  |  | 2.049659 | 2.068633 | 1.335870 | 3.807997 | 2.791498 |
| 17 H  |  | 2.375672 | 2.953567 | 1.964937 | 4.317242 | 2.633148 |
| 18 N  |  | 3.732541 | 2.441476 | 1.332882 | 2.221591 | 4.016758 |
| 19 N  |  | 5.020746 | 3.672279 | 2.238618 | 1.314243 | 5.138003 |
| 20 N  |  | 5.461968 | 4.789622 | 2.239181 | 1.324211 | 5.277310 |
| 21 N  |  | 4.319438 | 3.938325 | 1.340923 | 2.220078 | 4.208670 |

  

|      |  | 1        | 2        | 3        | 4        | 5        |
|------|--|----------|----------|----------|----------|----------|
| 1 C  |  | 0.000000 |          |          |          |          |
| 2 H  |  | 1.094981 | 0.000000 |          |          |          |
| 3 C  |  | 1.381600 | 2.151195 | 0.000000 |          |          |
| 4 H  |  | 2.148979 | 2.482422 | 1.089661 | 0.000000 |          |
| 5 C  |  | 2.367759 | 3.367727 | 1.378270 | 2.157537 | 0.000000 |
| 6 H  |  | 3.369150 | 4.287175 | 2.152039 | 2.505690 | 1.091753 |
| 7 C  |  | 2.691057 | 3.785636 | 2.371139 | 3.373327 | 1.379062 |
| 8 H  |  | 3.780177 | 4.874170 | 3.373809 | 4.298738 | 2.158871 |
| 9 C  |  | 2.254540 | 3.230559 | 2.696142 | 3.784752 | 2.371545 |
| 10 C |  | 3.593289 | 4.420416 | 4.194517 | 5.281748 | 3.770087 |
| 11 H |  | 3.960053 | 4.682073 | 4.660933 | 5.720364 | 4.336643 |
| 12 H |  | 4.396817 | 5.323187 | 4.736547 | 5.817469 | 4.008196 |
| 13 C |  | 4.571550 | 5.189289 | 5.256031 | 6.241345 | 4.988943 |
| 14 C |  | 6.419518 | 6.986665 | 6.856886 | 7.692476 | 6.500284 |
| 15 N |  | 1.316819 | 2.046961 | 2.382797 | 3.354250 | 2.771432 |

The geometry of the optimized structure M11L/6-311G(d,p)  
Ezpc -1097.521719 a.u.

|       |          |          |          |          |          |       |          |          |          |          |          |
|-------|----------|----------|----------|----------|----------|-------|----------|----------|----------|----------|----------|
| 16 N  | 4.047429 | 4.659078 | 4.889329 | 5.930372 | 4.697366 | 22 Cl | 7.340427 | 6.162483 | 4.176189 | 1.698744 | 7.252312 |
| 17 H  | 3.860593 | 4.252963 | 4.928808 | 5.908565 | 5.012929 |       | 16       | 17       | 18       | 19       | 20       |
| 18 N  | 4.935829 | 5.726876 | 5.283550 | 6.254015 | 4.713209 | 16 N  | 0.000000 |          |          |          |          |
| 19 N  | 5.927705 | 6.663458 | 6.184485 | 7.065015 | 5.610405 | 17 H  | 1.010712 | 0.000000 |          |          |          |
| 20 N  | 6.105774 | 6.503907 | 6.784011 | 7.612255 | 6.667964 | 18 N  | 2.293652 | 3.140899 | 0.000000 |          |          |
| 21 N  | 5.163924 | 5.554516 | 5.990880 | 6.882648 | 5.950064 | 19 N  | 3.453997 | 4.196553 | 1.299253 | 0.000000 |          |
| 22 Cl | 7.937192 | 8.473095 | 8.267057 | 9.017517 | 7.876619 | 20 N  | 3.432240 | 3.647874 | 2.701833 | 2.364497 | 0.000000 |
|       |          |          |          |          |          | 21 N  | 2.270145 | 2.365689 | 2.376798 | 2.699721 | 1.288673 |
|       |          |          |          |          |          | 22 Cl | 5.499119 | 5.986850 | 3.770522 | 2.569269 | 2.572868 |
|       |          |          |          |          |          |       | 21       | 22       |          |          |          |
|       |          |          |          |          |          | 21 N  | 0.000000 |          |          |          |          |
|       |          |          |          |          |          | 22 Cl | 3.763556 | 0.000000 |          |          |          |

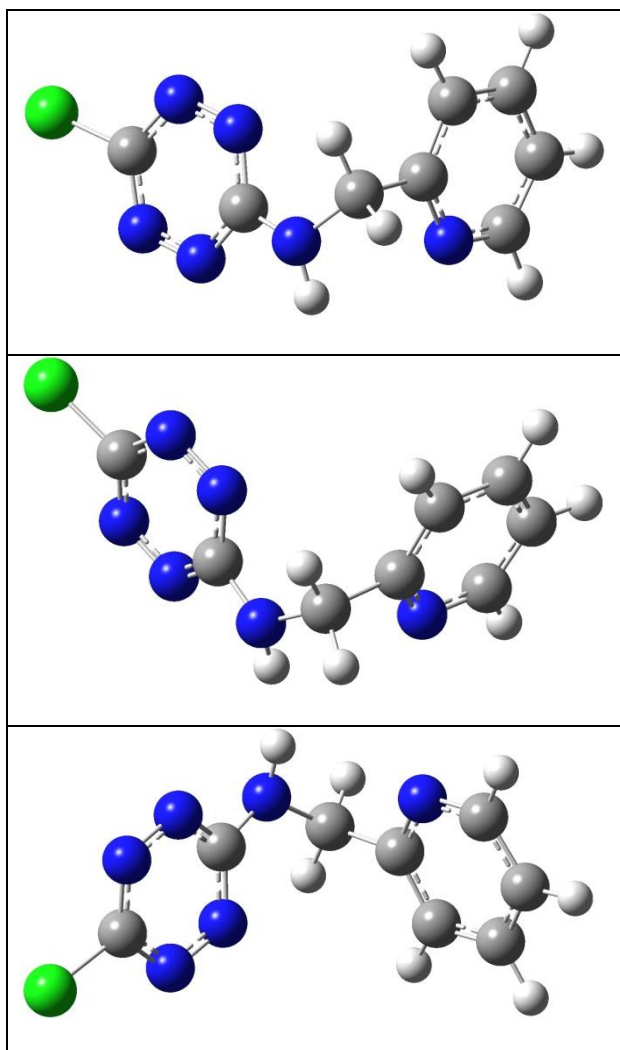

Figure S2. Different views of the optimized geometry of HL<sup>1</sup>.

**Table S3.** Molecular orbitals for the ligand **HL<sup>1</sup>** (orbital energies in eV); isovalue 0.04

|                                                                                     |                                  |                                                                                      |                       |
|-------------------------------------------------------------------------------------|----------------------------------|--------------------------------------------------------------------------------------|-----------------------|
| 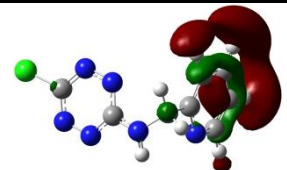   | 62 LUMO+4<br>0.2865              |    | 54 HOMO-3<br>-7.1250  |
|    | 61 LUMO+3<br>-1.6443             |    | 53 HOMO-4<br>-7.8851  |
|    | 60 LUMO+2<br>-1.8849             |    | 52 HOMO-5<br>-8.2512  |
|    | 59 LUMO+1<br>-2.0871             |    | 51 HOMO-6<br>-8.3292  |
|   | <b>58 LUMO</b><br><b>-3.7406</b> |   | 50 HOMO-7<br>-8.6462  |
|  | <b>57 HOMO</b><br><b>-6.0707</b> |  | 49 HOMO-8<br>-9.5432  |
|  | 56 HOMO-1<br>-6.4733             |  | 48 HOMO-9<br>-9.5936  |
|  | 55 HOMO-2<br>-7.0297             |  | 47 HOMO-10<br>-9.8647 |

## UV-visible spectroscopy of compounds 1-3

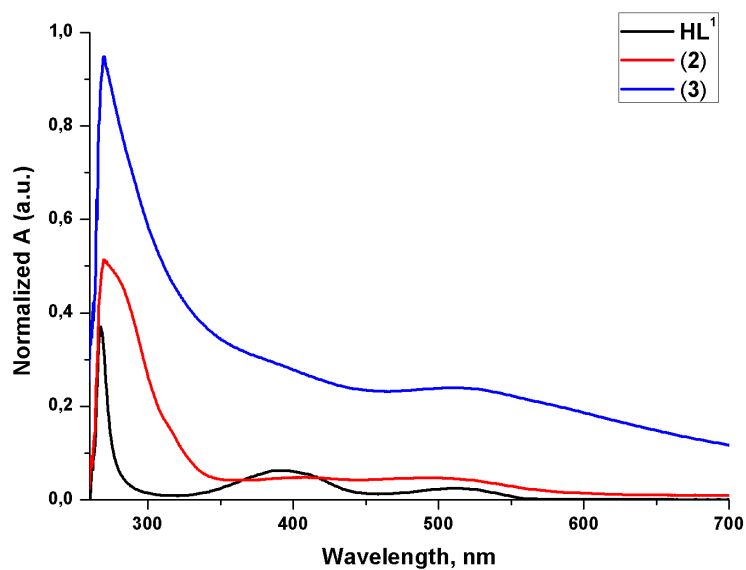

Figure S3. UV-visible absorption spectra of compounds **HL<sup>1</sup> 1** ( $c = 7 \cdot 10^{-5}$  M, black line), **2** ( $c = 4.88 \cdot 10^{-5}$  M, red line) and **3** ( $c = 4.83 \cdot 10^{-5}$  M, blue line) in methanol.

Table S4. UV-visible absorption bands of **HL<sup>1</sup> 1**, **2** and **3**

| Name                  | Transition     |                                                                      |
|-----------------------|----------------|----------------------------------------------------------------------|
|                       | $\lambda$ , nm | $\epsilon$ , L·mol <sup>-1</sup> ·cm <sup>-1</sup> , 10 <sup>4</sup> |
| <b>HL<sup>1</sup></b> | 267            | 0.529                                                                |
|                       | 392            | 0.086                                                                |
|                       | 512            | 0.036                                                                |
| <b>2</b>              | 270            | 1.045                                                                |
|                       | 406            | 0.098                                                                |
|                       | 500            | 0.096                                                                |
| <b>3</b>              | 270            | 1.946                                                                |
|                       | 512            | 0.497                                                                |

## Complex 2

**Table S5.** Selected bond lengths and angles for complex **2**

| Bond lengths | Å          |
|--------------|------------|
| Cu1–N1       | 2.0614(18) |
| Cu1–N2       | 1.9329(17) |
| Cu2–N6       | 1.9404(17) |
| Cu1–N7       | 1.9618(17) |
| Cu2–N11      | 1.9163(17) |
| Cu2–N12      | 2.0139(18) |
| Cu1–Cl3      | 2.4853(6)  |
| Cu2–Cl3      | 2.4575(6)  |
| Cu1–Cu2      | 2.4313(4)  |
| Angles       | °          |
| N2—Cu1—Cl3   | 102.24(5)  |
| N2—Cu1—Cu2   | 86.86(5)   |
| N2—Cu1—N1    | 82.91(7)   |
| N2—Cu1—N7    | 155.72(7)  |
| N5—N6—Cu2    | 119.43(13) |
| N6—Cu2—Cl3   | 101.69(5)  |
| N6—Cu2—Cu1   | 88.90(5)   |
| N6—Cu2—N12   | 103.53(7)  |
| N7—Cu1—Cl3   | 94.53(5)   |
| N7—Cu1—Cu2   | 86.50(5)   |
| N7—Cu1—N1    | 105.83(7)  |
| N11—Cu2—Cl3  | 106.05(5)  |
| N11—Cu2—Cu1  | 88.31(5)   |
| N11—Cu2—N12  | 84.01(7)   |
| N11—Cu2—N6   | 146.48(7)  |
| N12—Cu2—Cl3  | 110.64(5)  |
| N12—Cu2—Cu1  | 166.62(5)  |
| Cu1—Cu2—Cl3  | 61.108(15) |
| Cu2—Cl3—Cu1  | 58.926(14) |
| Cu2—Cu1—Cl3  | 59.967(15) |

**Table S6.** Hydrogen bonds and anion- $\pi$  interactions parameters for **2**

| $d(A\cdots H)$ , Å        | $d(A\cdots D)$ , Å        | $\angle (A-H-D)$ , ° |
|---------------------------|---------------------------|----------------------|
| Cl(3) $\cdots$ H(11) 2.94 | Cl(3) $\cdots$ C(11) 3.44 | 115                  |
| Cl(2) $\cdots$ H(4) 2.86  | Cl(2) $\cdots$ C(4) 3.69  | 150                  |
| $d(Cl\cdots TTZ)$ , Å     |                           |                      |
| Cl(1) $\cdots$ TTZ 3.76   |                           |                      |
| Cl(3) $\cdots$ TTZ 3.45   |                           |                      |

## Complex 3

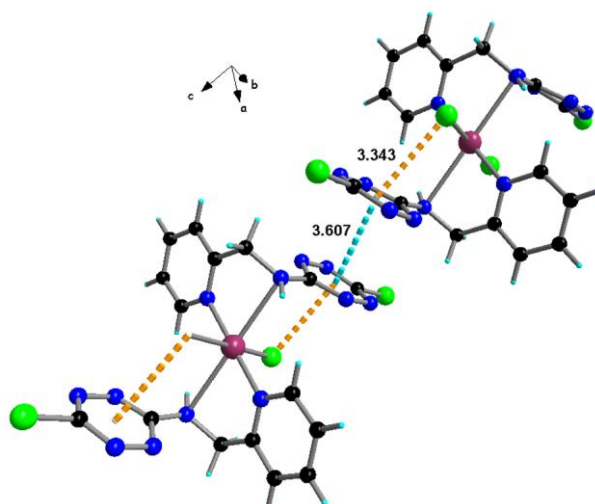

**Figure S4.** Crystal packing in the structure of **3** with an emphasis on the intramolecular Cl $\cdots$ TTZ (3.343 Å) and intermolecular TTZ $\cdots$ TTZ (3.607 Å) interactions highlighted in dotted orange and blue lines, respectively.

**Table S7.** Selected lengths (Å) and angles (°) for **3**

| Distances (Å) |            |                  |           |
|---------------|------------|------------------|-----------|
| C1—C2         | 1.372(4)   | C8—C12           | 1.709(3)  |
| C1—N1         | 1.345(3)   | C8—N3            | 1.332(4)  |
| C2—C3         | 1.394(4)   | C8—N6            | 1.334(4)  |
| C3—C4         | 1.381(4)   | C9—C10           | 1.444(4)  |
| C4—C5         | 1.382(4)   | C10—N7           | 1.130(4)  |
| C5—C6         | 1.508(3)   | N1—Cu1           | 1.998(2)  |
| C5—N1         | 1.343(3)   | N3—N4            | 1.331(3)  |
| C6—N2         | 1.460(3)   | N5—N6            | 1.322(3)  |
| C7—N2         | 1.360(3)   | Cl1—Cu1          | 2.3080(6) |
| C7—N4         | 1.336(4)   |                  |           |
| C7—N5         | 1.362(3)   |                  |           |
| Angles (°)    |            |                  |           |
| C1—C2—C3      | 118.1(2)   | N(1i)—Cu1—Cl1    | 90.56(6)  |
| C1—N1—Cu1     | 118.55(17) | N(1i)—Cu1—Cl(1i) | 89.44(6)  |
| C3—C4—C5      | 119.7(3)   | N2—C6—C5         | 114.4(2)  |
| C4—C3—C2      | 118.9(2)   | N2—C7—N5         | 115.3(2)  |
| C4—C5—C6      | 119.9(2)   | N3—C8—C12        | 117.8(2)  |
| C5—N1—C1      | 118.5(2)   | N3—C8—N6         | 126.5(3)  |
| C5—N1—Cu1     | 122.90(17) | N3—N4—C7         | 116.6(2)  |
| C7—N2—C6      | 120.7(2)   | N4—C7—N2         | 119.4(2)  |
| N1—C1—C2      | 123.3(2)   | N4—C7—N5         | 125.3(2)  |
| N1—C5—C4      | 121.5(2)   | N4—N3—C8         | 117.1(2)  |
| N1—C5—C6      | 118.6(2)   | N5—N6—C8         | 116.7(2)  |
| N1—Cu1—Cl1    | 89.44(6)   | N6—C8—C12        | 115.6(2)  |
| N1—Cu1—Cl(1i) | 90.56(6)   | N6—N5—C7         | 116.9(2)  |
| N1—Cu1—N1i    | 180        | N7—C10—C9        | 178.2(4)  |
|               |            | Cl(1i)—Cu1—Cl1   | 180       |

(i) 1-x, 1-y, 1-z.

## Complex 4

**Table S8.** Selected lengths (Å) and angles (°) for **4**

| Distances (Å) |            |             |            |
|---------------|------------|-------------|------------|
| C1—C2         | 1.378(4)   | C13—F4      | 1.330(3)   |
| C1—N1         | 1.344(3)   | C13—F5      | 1.331(3)   |
| C2—C3         | 1.381(4)   | C13—F6      | 1.325(3)   |
| C3—C4         | 1.378(4)   | C14—C15     | 1.391(4)   |
| C4—C5         | 1.391(3)   | C14—C18     | 1.534(3)   |
| C5—C6         | 1.508(3)   | C14—O3      | 1.258(3)   |
| C5—N1         | 1.342(3)   | C15—C16     | 1.390(4)   |
| C6—N2         | 1.463(3)   | C16—C17     | 1.531(4)   |
| C7—N2         | 1.357(3)   | C16—O4      | 1.262(3)   |
| C7—N3         | 1.349(3)   | C17—F7      | 1.317(3)   |
| C7—N5         | 1.345(3)   | C17—F8      | 1.313(3)   |
| C8—C11        | 1.712(3)   | C17—F9      | 1.306(4)   |
| C8—N4         | 1.327(3)   | C18—F10     | 1.325(3)   |
| C8—N6         | 1.335(3)   | C18—F11     | 1.334(3)   |
| C9—C10        | 1.379(4)   | C18—F12     | 1.326(3)   |
| C9—C13        | 1.519(4)   | N3—N4       | 1.321(3)   |
| C9—O1         | 1.265(3)   | N5—N6       | 1.319(3)   |
| C10—C11       | 1.407(4)   | N1—Cu1      | 1.9826(19) |
| C11—C12       | 1.540(4)   | N2—Cu1      | 2.5906(21) |
| C11—O2        | 1.238(3)   | O1—Cu1      | 1.9599(17) |
| C12—F1        | 1.282(4)   | O2—Cu1      | 2.2694(19) |
| C12—F2        | 1.254(4)   | O3—Cu1      | 1.9476(17) |
| C12—F3        | 1.339(5)   | O4—Cu1      | 1.9526(17) |
| Angles (°)    |            |             |            |
| C1—C2—C3      | 118.6(2)   | F10—C18—F11 | 107.7(2)   |
| C1—N1—Cu1     | 119.04(16) | F10—C18—F12 | 107.6(2)   |
| C3—C4—C5      | 119.7(2)   | F11—C18—C14 | 109.8(2)   |
| C4—C3—C2      | 119.1(2)   | F12—C18—C14 | 111.3(2)   |
| C4—C5—C6      | 120.7(2)   | F12—C18—F11 | 107.1(2)   |
| C5—N1—C1      | 119.0(2)   | N1—C1—C2    | 122.6(2)   |
| C5—N1—Cu1     | 121.91(16) | N1—C5—C4    | 121.0(2)   |
| C7—N2—C6      | 119.95(19) | N1—C5—C6    | 118.2(2)   |
| C9—C10—C11    | 123.2(2)   | N1—Cu1—O2   | 100.67(8)  |
| C9—O1—Cu1     | 123.83(15) | N2—C6—C5    | 113.40(19) |
| C10—C11—C12   | 115.9(2)   | N3—C7—N2    | 117.4(2)   |
| C10—C9—C13    | 118.0(2)   | N3—N4—C8    | 116.8(2)   |
| C11—O2—Cu1    | 117.15(17) | N4—C8—C11   | 116.84(19) |
| C14—O3—Cu1    | 124.68(16) | N4—C8—N6    | 126.7(2)   |
| C15—C14—C18   | 120.0(2)   | N4—N3—C7    | 116.8(2)   |
| C15—C16—C17   | 118.7(2)   | N5—C7—N2    | 117.3(2)   |
| C16—C15—C14   | 120.3(2)   | N5—C7—N3    | 125.3(2)   |
| C16—O4—Cu1    | 124.10(16) | N5—N6—C8    | 116.8(2)   |
| F1—C12—C11    | 113.3(3)   | N6—C8—C11   | 116.44(19) |
| F1—C12—F3     | 102.6(3)   | N6—N5—C7    | 116.8(2)   |
| F2—C12—C11    | 112.2(3)   | O1—C9—C10   | 130.2(2)   |
| F2—C12—F1     | 112.5(4)   | O1—C9—C13   | 111.7(2)   |
| F2—C12—F3     | 103.4(4)   | O1—Cu1—N1   | 90.76(7)   |
| F3—C12—C11    | 112.1(3)   | O1—Cu1—O2   | 87.32(7)   |
| F4—C13—C9     | 110.9(2)   | O2—C11—C10  | 128.4(2)   |
| F4—C13—F5     | 106.4(2)   | O2—C11—C12  | 115.7(2)   |
| F5—C13—C9     | 114.5(2)   | O3—C14—C15  | 128.0(2)   |
| F6—C13—C9     | 111.1(2)   | O3—C14—C18  | 112.0(2)   |
| F6—C13—F4     | 105.8(2)   | O3—Cu1—N1   | 170.67(8)  |
| F6—C13—F5     | 107.7(2)   | O3—Cu1—O1   | 86.44(7)   |
| F7—C17—C16    | 113.3(2)   | O3—Cu1—O2   | 88.10(7)   |
| F8—C17—C16    | 111.4(2)   | O3—Cu1—O4   | 91.16(7)   |



|             |          |            |           |
|-------------|----------|------------|-----------|
| F8—C17—F7   | 105.8(2) | O4—C16—C15 | 128.7(2)  |
| F9—C17—C16  | 110.1(2) | O4—C16—C17 | 112.6(2)  |
| F9—C17—F7   | 107.7(3) | O4—Cu1—N1  | 91.51(7)  |
| F9—C17—F8   | 108.4(3) | O4—Cu1—O1  | 177.53(7) |
| F10—C18—C14 | 113.1(2) | O4—Cu1—O2  | 93.21(7)  |

## Complex 5

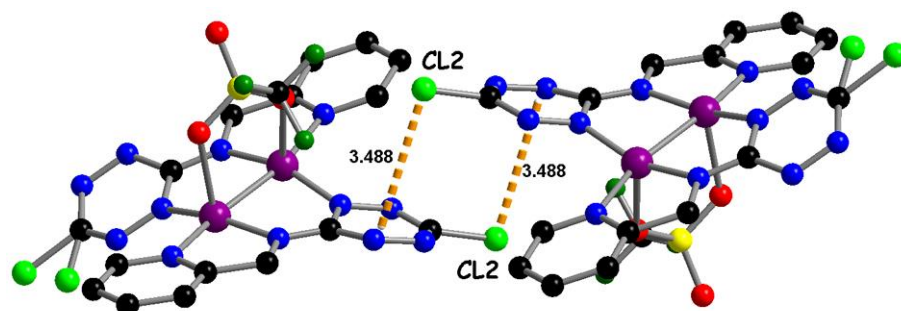

Figure S5. Cl...TTZ interactions in the structure of **5**.

Table S9. Selected lengths (Å) and angles (°) for **5**

| Distances (Å) |          |             |            |
|---------------|----------|-------------|------------|
| C1—N1         | 1.350(7) | C15—N9      | 1.386(7)   |
| C1—C2         | 1.370(9) | C16—N8      | 1.327(7)   |
| C2—C3         | 1.393(9) | C16—N10     | 1.346(7)   |
| C3—C4         | 1.389(9) | C16—CL2     | 1.714(6)   |
| C4—C5         | 1.389(8) | C17—F1      | 1.273(9)   |
| C5—N1         | 1.339(7) | C17—F2      | 1.317(9)   |
| C5—C6         | 1.505(7) | C17—F3      | 1.322(9)   |
| C6—N2         | 1.459(6) | C17—S1      | 1.839(7)   |
| C7—N2         | 1.305(7) | N3—N4       | 1.327(7)   |
| C7—N5         | 1.386(8) | N5—N6       | 1.322(7)   |
| C7—N3         | 1.391(7) | N7—N8       | 1.329(6)   |
| C8—N6         | 1.325(8) | N9—N10      | 1.308(7)   |
| C8—N4         | 1.354(8) | O1—S1       | 1.437(5)   |
| C8—CL1A       | 1.715(6) | O2—S1       | 1.450(5)   |
| C9—N12        | 1.342(7) | O3—S1       | 1.434(5)   |
| C9—C10        | 1.375(8) | Cu1—N2      | 1.892(4)   |
| C10—C11       | 1.379(9) | Cu1—N7      | 1.930(5)   |
| C11—C12       | 1.381(9) | Cu1—N1      | 2.028(4)   |
| C12—C13       | 1.386(8) | Cu1—O1      | 2.372(4)   |
| C13—N12       | 1.335(7) | Cu1—Cu2     | 2.5199(11) |
| C13—C14       | 1.495(8) | Cu2—N11     | 1.903(5)   |
| C14—N11       | 1.468(7) | Cu2—N5      | 1.923(5)   |
| C15—N11       | 1.298(7) | Cu2—N12     | 2.051(4)   |
| C15—N7        | 1.381(7) | Cu2—O2      | 2.422(5)   |
| Angles (°)    |          |             |            |
| C1—C2—C3      | 118.9(6) | N6—C8—CL1A  | 117.3(5)   |
| C1—C2—H2      | 120.600  | N7—C15—N9   | 120.0(5)   |
| C1—N1—Cu1     | 127.8(4) | N8—C16—N10  | 125.6(5)   |
| C3—C4—C5      | 118.9(5) | N8—C16—CL2  | 117.2(4)   |
| C4—C3—C2      | 118.9(5) | N8—N7—C15   | 118.5(4)   |
| C4—C5—C6      | 121.2(5) | N8—N7—Cu1   | 120.4(3)   |
| C5—N1—C1      | 119.0(5) | N9—N10—C16  | 118.0(4)   |
| C5—N1—Cu1     | 113.2(3) | N10—N9—C15  | 117.3(5)   |
| C6—N2—Cu1     | 117.1(3) | N10—C16—CL2 | 116.8(4)   |
| C7—N2—C6      | 118.1(4) | N11—C15—N7  | 117.8(5)   |
| C7—N2—Cu1     | 124.6(4) | N11—C15—N9  | 122.0(5)   |
| C7—N5—Cu2     | 121.1(4) | N11—C14—C13 | 109.6(4)   |
| C9—C10—C11    | 118.7(6) | N12—C9—C10  | 122.4(5)   |
| C9—N12—Cu2    | 128.6(4) | N12—C13—C12 | 121.4(5)   |
| C10—C11—C12   | 119.1(5) | N12—C13—C14 | 118.0(5)   |
| C11—C12—C13   | 119.3(5) | O1—S1—O2    | 113.7(3)   |
| C12—C13—C14   | 120.6(5) | O1—S1—C17   | 101.9(3)   |

|             |          |             |            |
|-------------|----------|-------------|------------|
| C13—N12—C9  | 119.2(5) | O2—S1—C17   | 104.1(3)   |
| C13—N12—Cu2 | 112.1(4) | O3—S1—O1    | 116.5(3)   |
| C14—N11—Cu2 | 116.3(3) | O3—S1—O2    | 115.5(3)   |
| C15—N11—C14 | 118.0(5) | O3—S1—C17   | 102.3(3)   |
| C15—N11—Cu2 | 125.4(4) | S1—O1—Cu1   | 126.9(3)   |
| C15—N7—Cu1  | 121.1(3) | S1—O2—Cu2   | 118.4(3)   |
| C16—N8—N7   | 116.2(5) | N1—Cu1—O1   | 93.10(17)  |
| F1—C17—S1   | 110.7(5) | N1—Cu1—Cu2  | 168.49(13) |
| F1—C17—F2   | 107.0(7) | N2—Cu1—N7   | 161.1(2)   |
| F1—C17—F3   | 106.7(6) | N2—Cu1—N1   | 83.19(18)  |
| F2—C17—S1   | 112.0(5) | N2—Cu1—Cu2  | 86.96(13)  |
| F2—C17—F3   | 109.7(7) | N2—Cu1—O1   | 108.31(19) |
| F3—C17—S1   | 110.5(6) | N5—Cu2—N12  | 105.3(2)   |
| N1—C1—C2    | 122.5(5) | N5—Cu2—O2   | 102.5(2)   |
| N1—C5—C4    | 121.8(5) | N5—Cu2—Cu1  | 86.18(15)  |
| N1—C5—C6    | 117.0(4) | N7—Cu1—N1   | 105.22(18) |
| N2—C6—C5    | 109.4(4) | N7—Cu1—O1   | 88.44(19)  |
| N2—C7—N5    | 118.7(5) | N7—Cu1—Cu2  | 85.96(13)  |
| N2—C7—N3    | 120.9(5) | N11—Cu2—N5  | 162.0(2)   |
| N3—N4—C8    | 117.3(5) | N11—Cu2—N12 | 83.04(18)  |
| N4—N3—C7    | 117.0(5) | N11—Cu2—Cu1 | 86.39(14)  |
| N4—C8—CL1A  | 116.0(5) | N11—Cu2—O2  | 94.0(2)    |
| N5—N6—C8    | 116.2(5) | N12—Cu2—O2  | 85.31(18)  |
| N5—C7—N3    | 120.3(5) | N12—Cu2—Cu1 | 168.44(13) |
| N6—N5—C7    | 119.0(5) | O1—Cu1—Cu2  | 84.33(11)  |
| N6—N5—Cu2   | 119.9(4) | O2—Cu2—Cu1  | 90.79(12)  |
| N6—C8—N4    | 126.2(6) |             |            |

## EPR measurements of complexes **3** and **4**

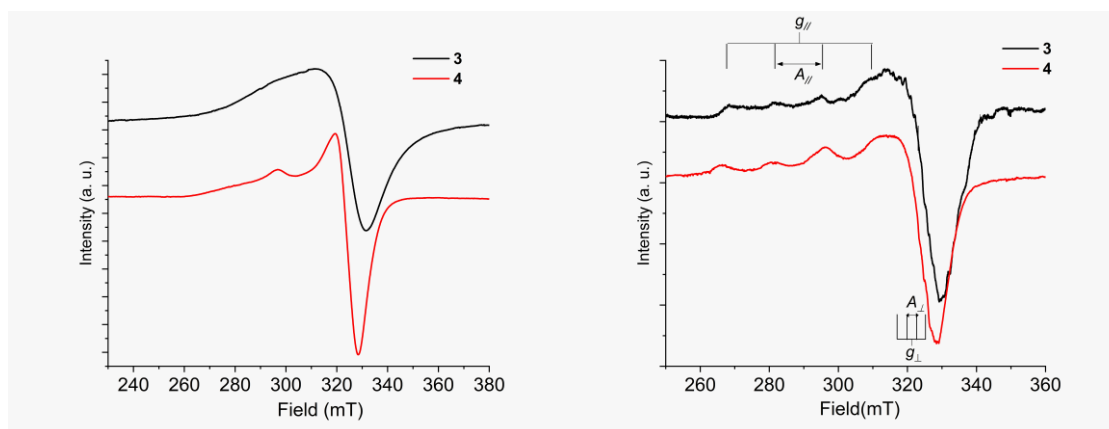

**Figure S6.** X-Band ( $\nu$  ca. 9.4 GHz) EPR spectra of **3** and **4** recorded at 50 K on microcrystalline powder (left) and frozen solution (right). See main text for experimental details.

## Magnetic measurements of complexes 2 and 5

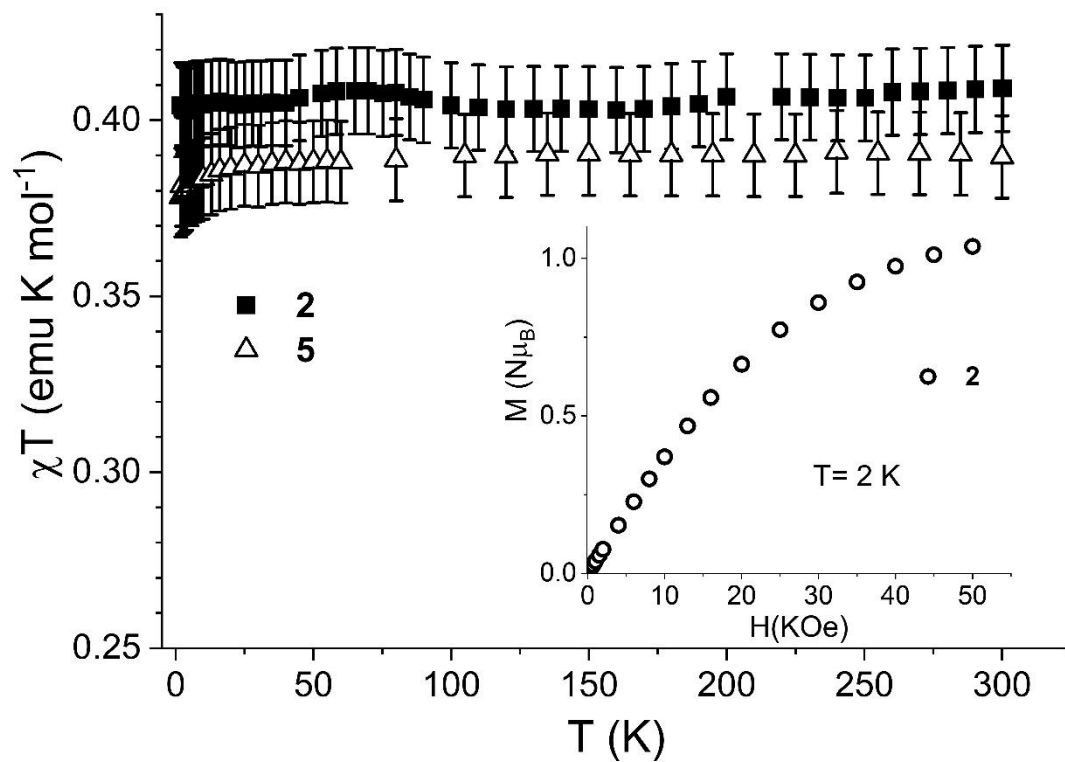

**Figure S7.**  $\chi T$  vs  $T$  product for **2** and **5** (main panel), and isothermal field dependent magnetization measured at 2 K for **2**. Error bars correspond to  $\pm 3\%$ .

## DFT calculations

### Complex 2

Table S10. Distance matrix for the optimized structure

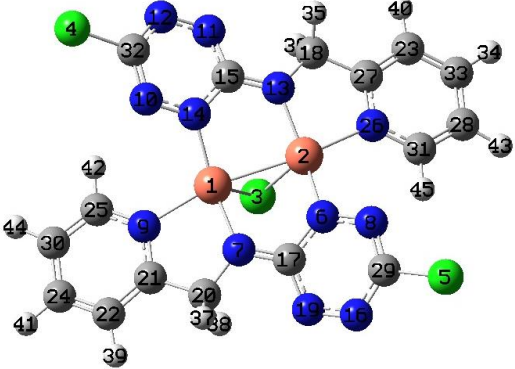

|      |          |          |          |           |           |      |          |           |           |           |          |
|------|----------|----------|----------|-----------|-----------|------|----------|-----------|-----------|-----------|----------|
|      | 1        | 2        | 3        | 4         | 5         |      | 11       | 12        | 13        | 14        | 15       |
| 1 Cu | 0.000000 |          |          |           |           | 11 N | 0.000000 |           |           |           |          |
| 2 Cu | 2.419266 | 0.000000 |          |           |           | 12 N | 1.282763 | 0.000000  |           |           |          |
| 3 Cl | 2.532603 | 2.532610 | 0.000000 |           |           | 13 N | 2.313842 | 3.443601  | 0.000000  |           |          |
| 4 Cl | 5.293653 | 6.664014 | 6.824287 | 0.000000  |           | 14 N | 2.364286 | 2.683995  | 2.261547  | 0.000000  |          |
| 5 Cl | 6.664007 | 5.293656 | 6.824315 | 11.379132 | 0.000000  | 15 C | 1.352728 | 2.258926  | 1.293633  | 1.361287  | 0.000000 |
| 6 N  | 2.950647 | 1.850888 | 3.407137 | 7.853382  | 3.766324  | 16 N | 8.397423 | 9.194982  | 6.325798  | 6.622293  | 7.059903 |
| 7 N  | 1.855744 | 3.000061 | 3.224350 | 6.939546  | 5.469299  | 17 C | 6.361896 | 7.059914  | 4.519084  | 4.431574  | 5.022308 |
| 8 N  | 4.236572 | 2.742834 | 4.475441 | 8.954729  | 2.565964  | 18 C | 2.652596 | 3.921809  | 1.423016  | 3.553366  | 2.312972 |
| 9 N  | 2.007144 | 4.381977 | 3.618447 | 5.305536  | 8.027956  | 19 N | 7.695781 | 8.397433  | 5.809965  | 5.758552  | 6.361892 |
| 10 N | 2.742834 | 4.236572 | 4.475418 | 2.565963  | 8.954723  | 20 C | 6.822643 | 7.183893  | 5.620524  | 4.584369  | 5.618144 |
| 11 N | 4.030717 | 4.036739 | 4.464129 | 3.767045  | 9.202970  | 21 C | 6.477576 | 6.609011  | 5.780932  | 4.255783  | 5.450760 |
| 12 N | 4.492811 | 5.034923 | 5.298885 | 2.583311  | 10.144601 | 22 C | 7.605744 | 7.600060  | 7.103809  | 5.451110  | 6.681822 |
| 13 N | 3.000074 | 1.855744 | 3.224396 | 5.469310  | 6.939525  | 23 C | 5.085761 | 6.348305  | 3.684368  | 5.927384  | 4.785482 |
| 14 N | 1.850893 | 2.950644 | 3.407130 | 3.766327  | 7.853372  | 24 C | 7.658016 | 7.453284  | 7.567035  | 5.690424  | 6.935243 |
| 15 C | 2.814809 | 2.779858 | 3.516906 | 4.206913  | 7.941495  | 25 C | 5.311233 | 5.093234  | 5.472789  | 3.464235  | 4.680424 |
| 16 N | 5.034923 | 4.492793 | 5.298859 | 10.144621 | 2.583309  | 26 N | 4.738784 | 5.958086  | 2.568710  | 4.561521  | 3.844168 |
| 17 C | 2.779861 | 2.814794 | 3.516875 | 7.941515  | 4.206906  | 27 C | 4.119940 | 5.390722  | 2.381188  | 4.619258  | 3.572972 |
| 18 C | 4.356451 | 2.806232 | 3.960546 | 6.291577  | 7.453382  | 28 C | 6.802627 | 8.071244  | 4.837857  | 6.921925  | 6.106297 |
| 19 N | 4.036741 | 4.030693 | 4.464076 | 9.202996  | 3.767046  | 29 C | 7.900062 | 8.787514  | 5.699850  | 6.364836  | 6.589773 |
| 20 C | 2.806228 | 4.356425 | 3.960455 | 7.453412  | 6.291567  | 30 C | 6.593349 | 6.266166  | 6.838669  | 4.829826  | 6.038528 |
| 21 C | 2.796654 | 4.933460 | 4.139454 | 6.546668  | 7.697707  | 31 C | 6.052343 | 7.279820  | 3.890519  | 5.804053  | 5.160774 |
| 22 C | 4.141507 | 6.303313 | 5.279082 | 7.214625  | 8.777507  | 32 C | 2.222826 | 1.330798  | 3.787115  | 2.210513  | 2.511942 |
| 23 C | 6.303297 | 4.141493 | 5.279053 | 8.777527  | 7.214636  | 33 C | 6.382296 | 7.655637  | 4.751887  | 6.973269  | 5.945417 |
| 24 C | 4.751588 | 7.066019 | 5.864021 | 6.763424  | 10.038307 |      | 16       | 17        | 18        | 19        | 20       |
| 25 C | 3.021169 | 5.376833 | 4.382109 | 4.690495  | 9.338005  | 16 N | 0.000000 |           |           |           |          |
| 26 N | 4.381953 | 2.007129 | 3.618393 | 8.027964  | 5.305573  | 17 C | 2.258922 | 0.000000  |           |           |          |
| 27 C | 4.933454 | 2.796646 | 4.139455 | 7.697721  | 6.546672  | 18 C | 7.183865 | 5.618136  | 0.000000  |           |          |
| 28 C | 6.663471 | 4.299403 | 5.471165 | 10.296460 | 5.511896  | 19 N | 1.282765 | 1.352727  | 6.822622  | 0.000000  |          |
| 29 C | 5.036059 | 3.929395 | 5.286367 | 9.942761  | 1.701513  | 20 C | 3.921808 | 2.312969  | 6.895585  | 2.652595  | 0.000000 |
| 30 C | 4.299428 | 6.663525 | 5.471308 | 5.511792  | 10.296448 | 21 C | 5.390728 | 3.572978  | 7.095548  | 4.119950  | 1.486809 |
| 31 C | 5.376782 | 3.021144 | 4.381978 | 9.338011  | 4.690593  | 22 C | 6.348309 | 4.785488  | 8.403164  | 5.085771  | 2.502753 |
| 32 C | 3.929401 | 5.036062 | 5.286358 | 1.701513  | 9.942753  | 23 C | 7.600000 | 6.681777  | 2.502752  | 7.605672  | 8.403095 |
| 33 C | 7.065980 | 4.751565 | 5.863924 | 10.038324 | 6.763477  | 24 C | 7.655649 | 5.945431  | 8.837330  | 6.382315  | 3.752335 |
|      | 6        | 7        | 8        | 9         | 10        | 25 C | 7.279837 | 5.160793  | 6.716689  | 6.052365  | 3.620066 |
| 6 N  | 0.000000 |          |          |           |           | 26 N | 5.306020 | 4.321886  | 2.394591  | 5.247056  | 6.164210 |
| 7 N  | 2.261545 | 0.000000 |          |           |           | 27 C | 6.608966 | 5.450727  | 1.486809  | 6.477524  | 7.095500 |
| 8 N  | 1.302074 | 3.426140 | 0.000000 |           |           | 28 C | 6.266091 | 6.038453  | 4.195853  | 6.593235  | 8.064819 |
| 9 N  | 4.561536 | 2.568713 | 5.836857 | 0.000000  |           | 29 C | 1.330797 | 2.511937  | 6.417260  | 2.222828  | 4.650615 |
| 10 N | 5.336284 | 4.449348 | 6.493436 | 3.213285  | 0.000000  | 30 C | 8.071259 | 6.106314  | 8.064953  | 6.802648  | 4.195850 |
|      |          |          |          |           |           | 31 C | 5.093170 | 4.680354  | 3.620067  | 5.311131  | 6.716568 |
|      |          |          |          |           |           | 32 C | 8.787525 | 6.589789  | 4.650622  | 7.900080  | 6.417288 |
|      |          |          |          |           |           | 33 C | 7.453210 | 6.935179  | 3.752333  | 7.657916  | 8.837221 |
|      |          |          |          |           |           |      | 21       | 22        | 23        | 24        | 25       |
|      |          |          |          |           |           | 21 C | 0.000000 |           |           |           |          |
|      |          |          |          |           |           | 22 C | 1.383160 | 0.000000  |           |           |          |
|      |          |          |          |           |           | 23 C | 8.904066 | 10.226608 | 0.000000  |           |          |
|      |          |          |          |           |           | 24 C | 2.376921 | 1.374024  | 10.828540 | 0.000000  |          |
|      |          |          |          |           |           | 25 C | 2.279695 | 2.694832  | 8.893628  | 2.366425  | 0.000000 |
|      |          |          |          |           |           | 26 N | 6.840217 | 8.184547  | 2.371820  | 8.950081  | 7.233039 |
|      |          |          |          |           |           | 27 C | 7.567846 | 8.904081  | 1.383157  | 9.514885  | 7.584516 |
|      |          |          |          |           |           | 28 C | 8.910177 | 10.207773 | 2.370633  | 11.055674 | 9.478883 |
|      |          |          |          |           |           | 29 C | 6.031618 | 7.150722  | 6.635328  | 8.385471  | 7.656091 |



**Table S11.** Molecular orbitals for the complex **2** (orbital energies in eV); isovalue 0.04

|                                                                                                                                                  |                                                                                                                                                   |
|--------------------------------------------------------------------------------------------------------------------------------------------------|---------------------------------------------------------------------------------------------------------------------------------------------------|
| 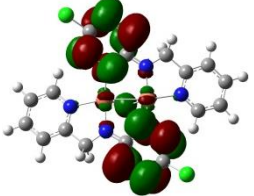 <p>153<math>\alpha</math> -0.14357</p>                         |  <p>153<math>\beta</math> -0.14152</p>                           |
|  <p>152<math>\alpha</math> -0.14440</p>                         |  <p>152<math>\beta</math> -0.14213</p>                           |
|  <p>151<math>\alpha</math> <math>\uparrow</math> -0.20363</p>   |  <p>151<math>\beta</math> -0.14869</p>                           |
|  <p>150<math>\alpha</math> <math>\uparrow</math> -0.20726</p>  |  <p>150<math>\beta</math> <math>\downarrow</math> -0.18998</p>  |
|  <p>149<math>\alpha</math> <math>\uparrow</math> -0.21938</p> |  <p>149<math>\beta</math> <math>\downarrow</math> -0.20676</p> |
|  <p>148<math>\alpha</math> <math>\uparrow</math> -0.22227</p> |  <p>148<math>\beta</math> <math>\downarrow</math> -0.21625</p> |



**Table S12.** Calculated Mulliken charge and spin density for the complex **2**

|      | Mulliken charge | Spin density |
|------|-----------------|--------------|
| 1 Cu | 1.078548        | 0.384634     |
| 2 Cu | 1.078548        | 0.384628     |
| 3 Cl | -0.759923       | 0.020911     |
| 4 Cl | -0.050523       | 0.001541     |
| 5 Cl | -0.050522       | 0.001541     |
| 6 N  | -0.625289       | 0.024236     |
| 7 N  | -0.845749       | 0.059242     |
| 8 N  | -0.174409       | -0.018427    |
| 9 N  | -0.764105       | 0.041982     |
| 10 N | -0.174414       | -0.018428    |
| 11 N | -0.301150       | 0.007689     |
| 12 N | -0.195304       | -0.021227    |
| 13 N | -0.845754       | 0.059238     |
| 14 N | -0.625287       | 0.024237     |
| 15 C | 0.866198        | -0.009210    |
| 16 N | -0.195307       | -0.021225    |
| 17 C | 0.866192        | -0.009210    |
| 18 C | 0.025621        | -0.001020    |
| 19 H | 0.160309        | 0.003008     |
| 20 H | 0.188563        | 0.000074     |
| 21 N | -0.301148       | 0.007686     |
| 22 C | 0.025621        | -0.001020    |
| 23 H | 0.160309        | 0.003009     |
| 24 H | 0.188564        | 0.000074     |
| 25 C | 0.376086        | -0.001117    |
| 26 C | -0.255494       | 0.002739     |
| 27 H | 0.122129        | 0.001049     |
| 28 C | -0.255498       | 0.002739     |
| 29 H | 0.122128        | 0.001049     |
| 30 C | 0.067060        | -0.003835    |
| 31 H | 0.127695        | 0.000253     |
| 32 C | 0.227133        | -0.004101    |
| 33 H | 0.157998        | 0.002220     |
| 34 N | -0.764108       | 0.041983     |
| 35 C | 0.376092        | -0.001117    |
| 36 C | -0.263837       | 0.004572     |
| 37 H | 0.125442        | 0.000710     |
| 38 C | 0.333042        | 0.014538     |
| 39 C | -0.263836       | 0.004572     |
| 40 H | 0.125442        | 0.000710     |
| 41 C | 0.227143        | -0.004101    |
| 42 H | 0.157989        | 0.002220     |
| 43 C | 0.333047        | 0.014540     |
| 44 C | 0.067061        | -0.003835    |
| 45 H | 0.127696        | 0.000253     |

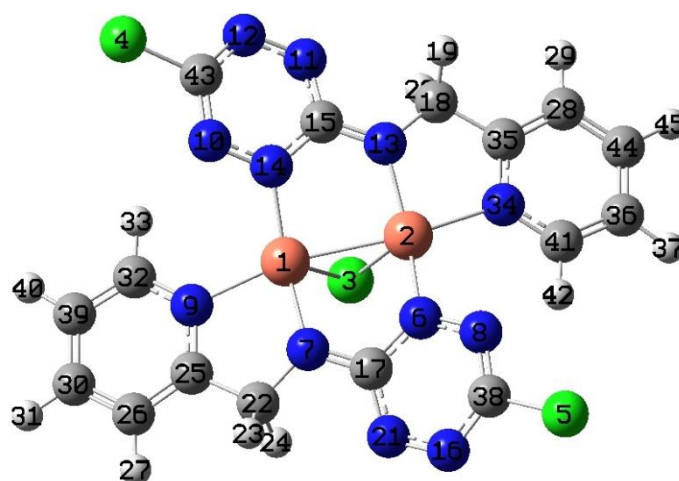

## DFT calculations

### Complex 5

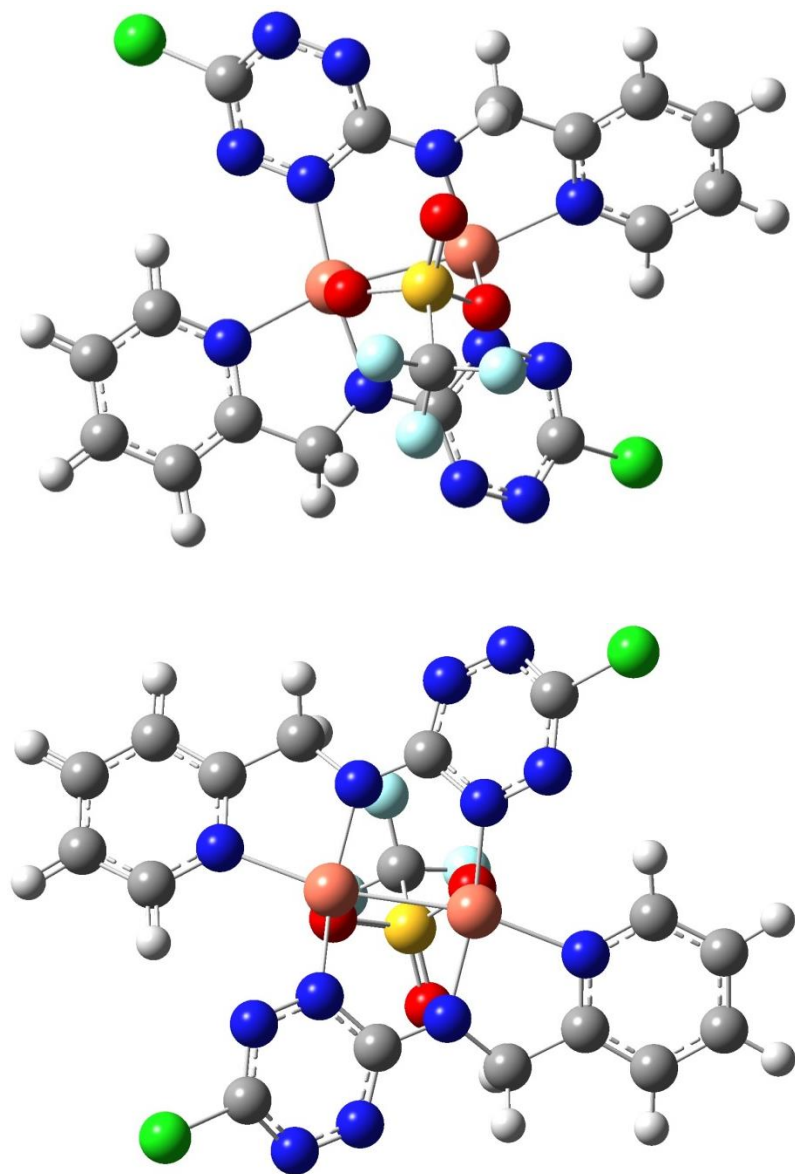

**Figure S9.** Different views of the optimized geometry of **5**.

**Table S13.** Molecular orbitals for the complex **5** (orbital energies in eV); isovalue 0.04

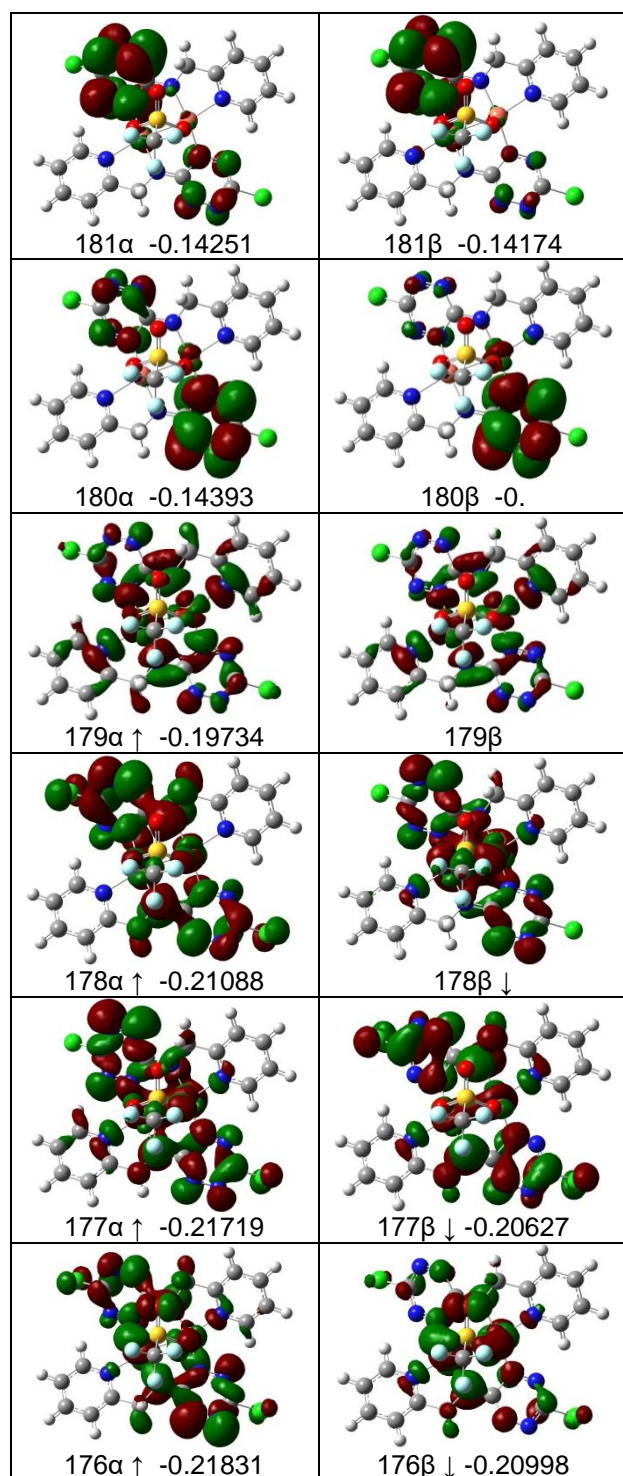

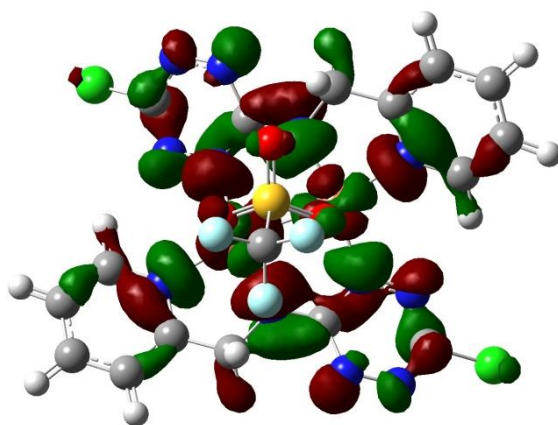

**Figure S10.** Graphical representation of the singly occupied molecular orbital (SOMO, orbital 179 $\alpha$ ) of complex **5** at the M11L/6-311G(d,p) level of theory.

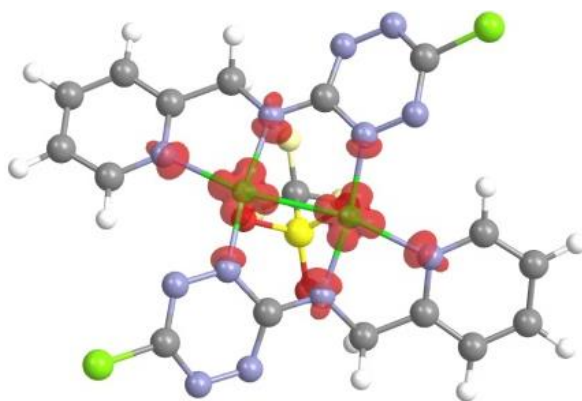

**Figure S11.** Spin density map in complex **5** (isovalue 0.005). The spin density value on each Cu equals 0.3749 (Cu1) and 0.3659 (Cu2).

## DFT calculations

### Complex 3

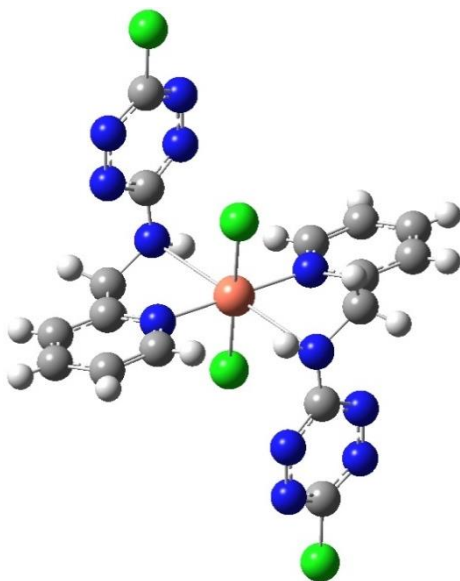

**Figure S12.** Optimized geometry of **3**.

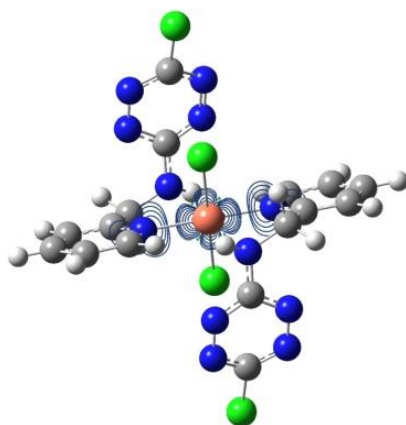

**Figure S13.** Spin density map in complex **3** (isovalue 0.005). The spin density value on Cu equals 0.6175.

## NMR Spectra of HL<sup>1</sup>

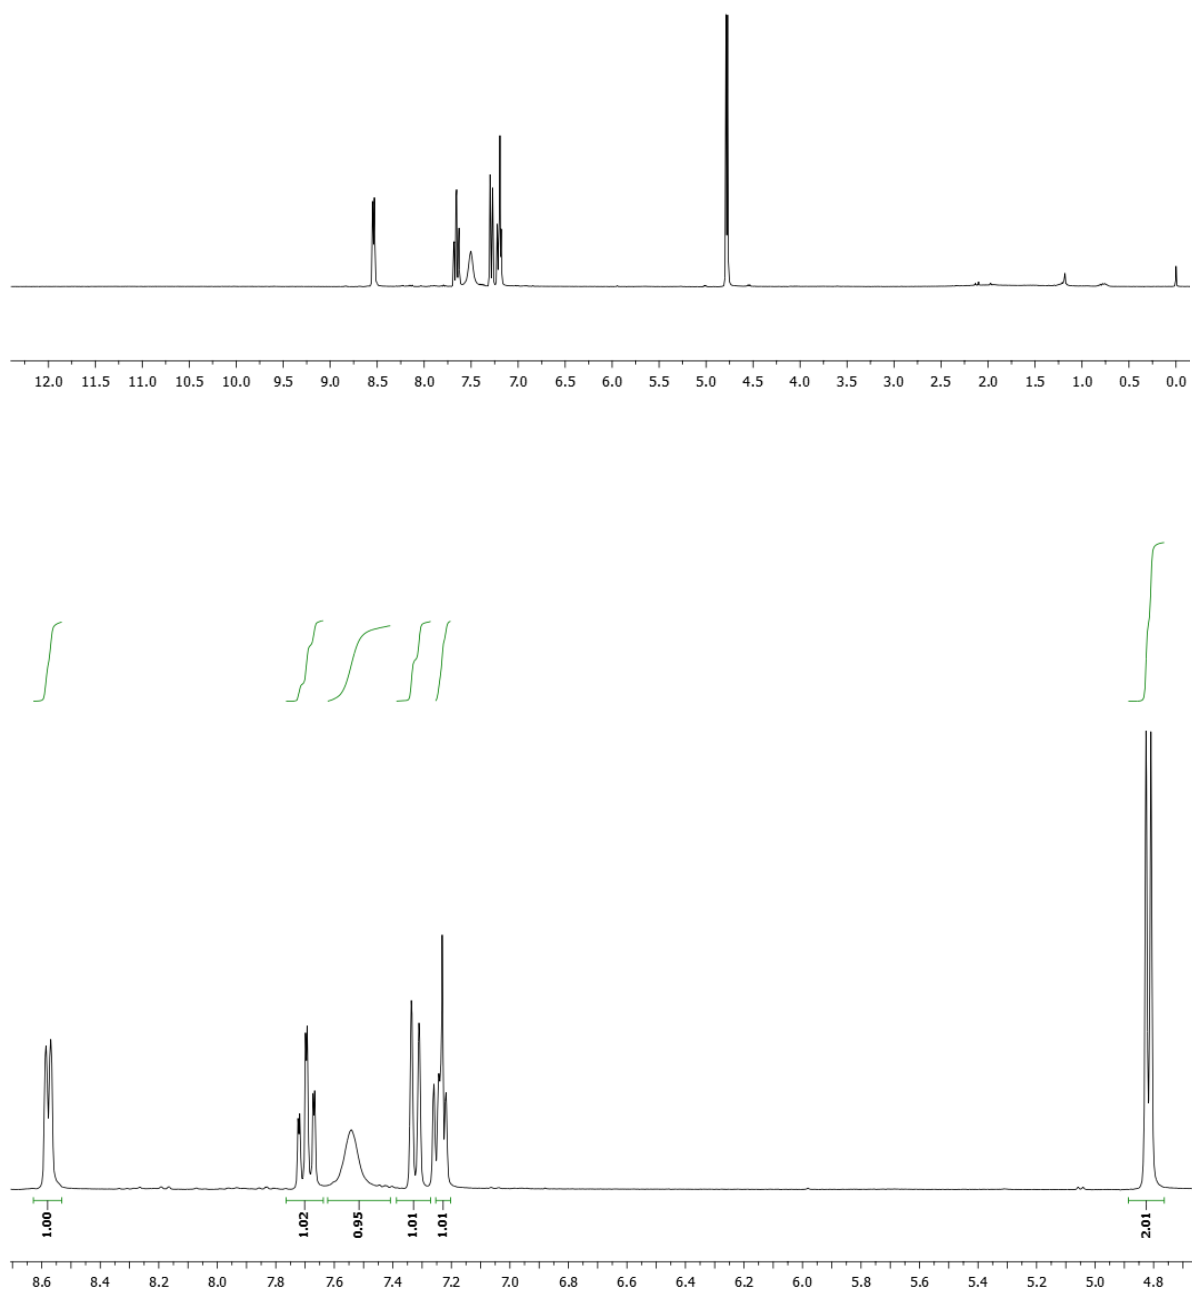

Figure S14. <sup>1</sup>H NMR spectrum of HL<sup>1</sup> in CDCl<sub>3</sub>

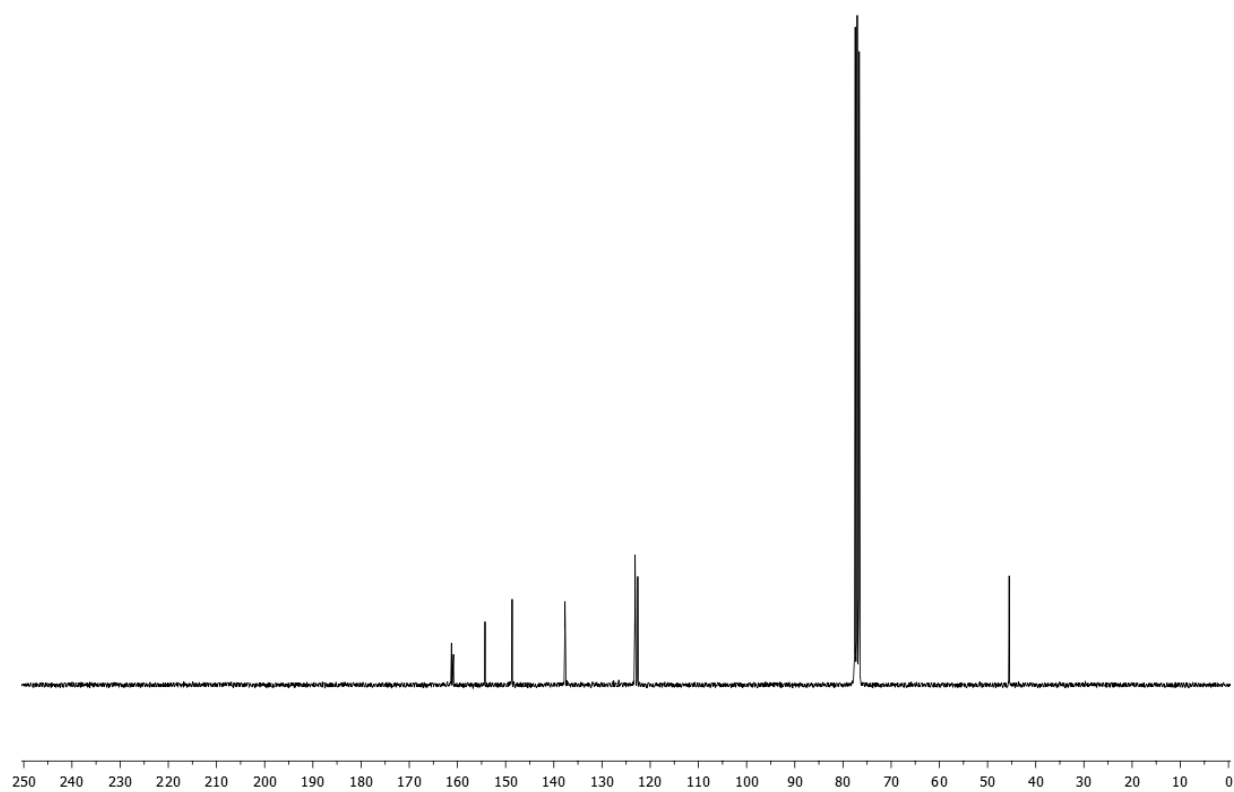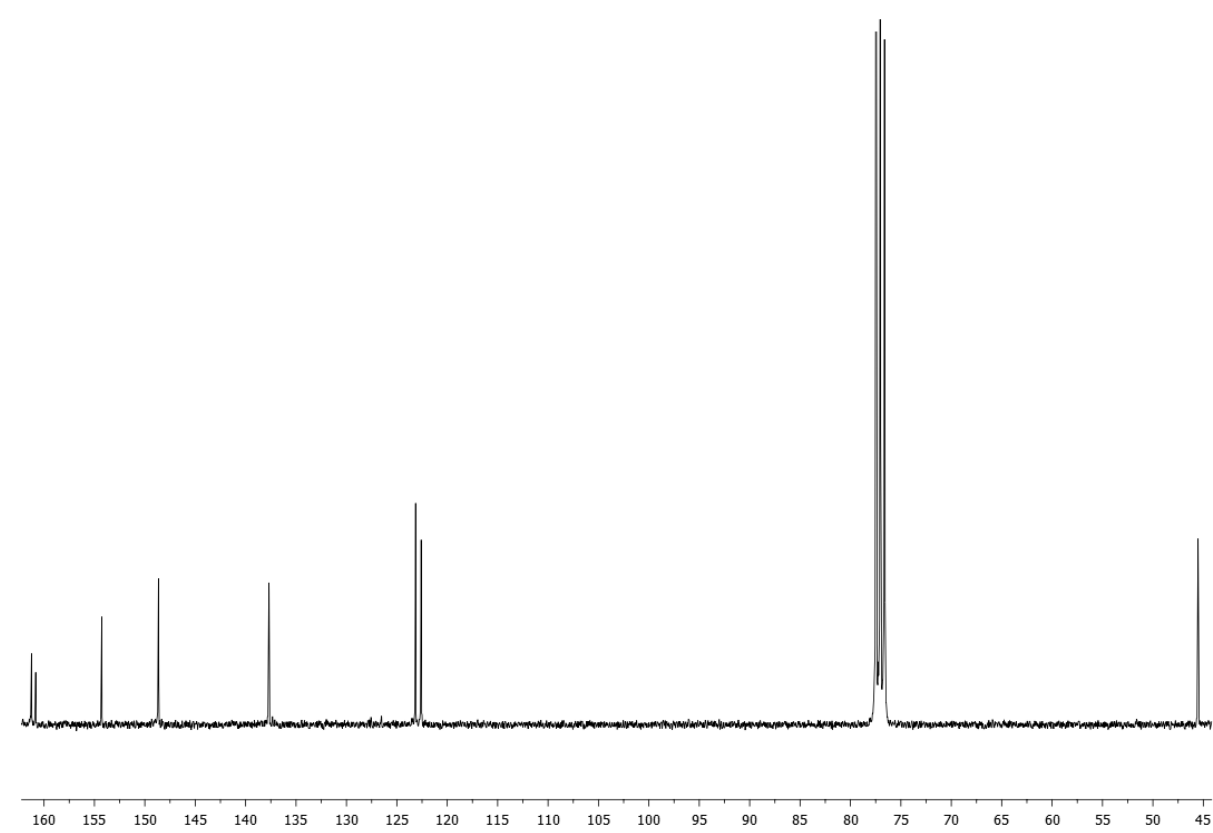

Figure S15.  $^{13}\text{C}$  NMR spectrum of  $\text{HL}^1$  in  $\text{CDCl}_3$
